# Supplementary material for: Light-induced engagement of microglia to focally remodel synapses in the adult brain
Source: eLife. 2020 Aug 18;9:e58435. doi: 10.7554/eLife.58435 (PMC7470825; doi:10.7554/eLife.58435)
Supplement: Figure 1—source data 1. — *p-value after GEE analysis. [file elife-58435-fig1-data1.xlsx]

## Sheet: Table1
	p-value*					p-value*
Time curves	Baseline-SP vs PD-SP	Baseline-NS vs PD-NS	Baseline-NB vs PD-NB			PD-SP vs PD-NS	PD-SP vs PD-NB	PD-NS vs PD-NB
Contact area (%)	0.001	0.016	0.04			0.687	0.003	0.006
Turnover (%)	<0.001	<0.001	0.463			<0.001	<0.001	0.915
	p-value*
	PD-SP	PD-NS	PD-NB
Correlation between Contact area vs Turnover time curves	0.001	0.005	0.042
