# Supplementary material for: Light-induced engagement of microglia to focally remodel synapses in the adult brain
Source: eLife. 2020 Aug 18;9:e58435. doi: 10.7554/eLife.58435 (PMC7470825; doi:10.7554/eLife.58435)
Supplement: Figure 1—source data 2. — Data were combined across 13 time points to compute the average values of each parameter over 2 hr. For this analysis, replicates were averaged per mouse. *p-values correspond to the Wilcoxon paired test. [file elife-58435-fig1-data2.xlsx]

## Sheet: Table 2
		Spine-PD				Near-Spine-PD				Near-Bouton-PD				p-value*
		Baseline-SP	Spine-PD	p-value*		Baseline-NS	NS-PD	p-value*		Baseline-NB	NB-PD	p-value*		SP-PD vs NS-PD	SP-PD vs NB-PD	NS-PD vs NB-PD
		Mean(SEM)	Mean(SEM)			Mean(SEM)	Mean(SEM)			Mean(SEM)	Mean(SEM)
Number of dendrites/axons (number of spines/boutons)		36 (538)	47 (700)			32 (438)	35 (490)			31 (158)	34 (230)
Number of boutons or spines per dendrite or axon		14.94(0.62)	14.77(0.44)			15.11(0.68)	11.68(0.58)			5.18(0.21)	4.9(0.24)
Microglia-Neuron Contact
Mean microglia-neuron contact area (µm2)		0.61(0.28)	2.50(0.34)	0.004		0.15(0.05)	2.32(0.33)	0.001		0.09(0.036)	1.621(0.16)	0.001		0.05	0.002	0.042
Mean contact area/ thy1 area (%)		0.53(0.19)	4.39(0.59)	0.001		0.24(0.06)	3.79(0.53)	0.001		0.71(0.18)	7.36(0.92)	0.001		0.03	0.001	0.05
Microglia-Contacted spines/boutons
Contacted spines/boutons (%)		22.96(2.68)	42.89(1.41)	<0.001		23.28(3.46)	34.86(1.69)	0.016		43.71(4.82)	35.36(1.98)	0.232		0.001	0.001	0.638
Contact duration (min)		22.10(2.30)	60.97(3.33)	0.016		21.48(3.04)	50.33(3.22)	0.031		21.18(2.53)	70.57(6.35)	0.031		0.027	0.206	0.032
Turnover
Mean turnover (%)		0.63(0.47)	20.91(1.064)	<0.001		0.22(0.17)	5.83(0.75)	0.001		2.76(1.24)	9.23(1.18)	0.001		0.001	0.001	0.003
Mean Gained spines/boutons (%)		0.04(0.04)	10.45(0.723)	<0.001		0.05(0.05)	3.26(0.45)	0.001		1.14(0.93)	7.43(1.07)	0.001		0.001	0.042	0.007
Mean Lost spines/boutons (%)		0.13(0.13)	10.46(0.578)	<0.001		0.17(0.17)	2.57(0.54)	0.004		1.39(0.81)	1.80(0.57)	0.813		0.001	0.001	0.375
Filopodia
Total Number of Filopodia events (Number of mice)		0(0)	6(4)			0(0)	7(6)			1(1)	31(11)
Number of Filopodia events per replicate		0(0)	1.25(0.25)			0(0)	1(0)			1	1.33(0.11)
Filopodia ocurrence (%)		0(0)	11.98(5.69)	0.125		0(0)	23.61(7.53)	0.031		3.03	79.55(7.73)	0.001		0.422	0.003	0.002
Filopodia stability (%)		0(0)	62.5(10.49)			0(0)	34.03(9.77)			75	50.56(4.88)
Filopodia lenght (µm)		0(0)	2.65(0.36)			0(0)	1.50(0.31)			1.53	1.93(0.09)
