# Supplementary material for: Light-induced engagement of microglia to focally remodel synapses in the adult brain
Source: eLife. 2020 Aug 18;9:e58435. doi: 10.7554/eLife.58435 (PMC7470825; doi:10.7554/eLife.58435)
Supplement: Figure 1—source data 3. [file elife-58435-fig1-data3.xlsx]

## Sheet: Fig1_C2;D2;E2
		Time (minutes)
		0	10	20	30	40	50	60	70	80	90	100	110	120
Spine-PD
	Normalized microglia contact area %	0	5.63894	4.01696	3.78088	3.3529	1.09307	1.33951	0.561239	0.330033	0.568721	0	0.0672043	0.164474
	Turnover %	0.367913	6.57235	7.16709	6.82615	6.45604	6.26209	5.42966	3.8541	3.39082	3.13359	2.83938	2.57098	2.21887
Near-Spine-PD
	Normalized microglia contact area %	0	1.14561	1.60131	1.56387	0.735298	0.301459	0.155172	0.16916	0.556097	0.359088	0.636393	0	0
	Turnover %	0.387787	4.8527	6.41745	7.22152	6.97209	5.85072	4.88278	4.17708	3.98251	3.03536	3.07066	2.46519	1.96
Near-Bouton-PD
	Normalized microglia contact area %	0	2.17798	1.40023	1.82787	1.2025	1.48463	0.274725	0.717338	0.579976	0.401913	0.714286	0	0
	Turnover %	0.977417	6.33772	8.7884	10.7314	11.6829	12.3797	11.8381	10.1693	8.97078	6.98204	7.04696	5.27284	5.125

## Sheet: Fig1_C3;D3;E3
ID	Type of Photodamage	MiceID	Lost%	Gained%
1	Near-Bouton-PD	167	7.14286	17.2439
2	Near-Bouton-PD	169	5.55556	11.1111
3	Near-Bouton-PD	14769	0	8.39161
4	Near-Bouton-PD	16801	0	6.26781
5	Near-Bouton-PD	16944	1.92308	12.9731
6	Near-Bouton-PD	17307	5	10.5556
7	Near-Bouton-PD	17357	0	3.7037
8	Near-Bouton-PD	18203	0	8.39161
9	Near-Bouton-PD	16558	2.5641	5.12821
10	Near-Bouton-PD	16922	2.5641	9.29811
11	Near-Bouton-PD	17167	0	12.6984
12	Near-Bouton-PD	17309	0	5.55556
13	Near-Bouton-PD	17470	3.84615	3.33333
14	Near-Bouton-PD	18202	3.84615	3.84615
15	Near-Spine-PD	167	7.15198	3.44828
16	Near-Spine-PD	169	3.22581	6.67408
17	Near-Spine-PD	11807	5.88745	5.88745
18	Near-Spine-PD	11810	6.67408	6.67408
19	Near-Spine-PD	14769	3.7037	3.7037
20	Near-Spine-PD	16801	2.10181	2.10181
21	Near-Spine-PD	16944	5.57276	2.94118
22	Near-Spine-PD	17307	4.55487	2.94118
23	Near-Spine-PD	17357	0	1.44928
24	Near-Spine-PD	18203	2.63158	0
25	Near-Spine-PD	16558	0	4.35309
26	Near-Spine-PD	16922	3.41006	4.74339
27	Near-Spine-PD	17167	3.88889	5.02137
28	Near-Spine-PD	17309	1.59754	2.65017
29	Near-Spine-PD	17470	3.367	5.21886
30	Near-Spine-PD	18202	0	4
31	Spine-PD	167	4.16667	9.10973
32	Spine-PD	169	11.1111	15.8824
33	Spine-PD	11807	13.168	14.7864
34	Spine-PD	11810	10.8242	14.161
35	Spine-PD	14769	11.3558	7.99812
36	Spine-PD	16801	8.77992	8.79999
37	Spine-PD	16944	13.033	11.3345
38	Spine-PD	17307	9.73936	11.2354
39	Spine-PD	17357	10.1104	10.3347
40	Spine-PD	18203	10.3657	13.5716
41	Spine-PD	16558	14.0851	9.89698
42	Spine-PD	16922	11.1623	10.3872
43	Spine-PD	17167	11.5105	8.82064
44	Spine-PD	17309	10.1101	5.79096
45	Spine-PD	17470	10.0042	7.22791
46	Spine-PD	18202	7.87949	7.87949

## Sheet: Fig1_C4;D4;E4
ID	Type of Photodamage	MiceID	Filopodia ocurrence%
1	Near-Bouton-PD	167	50
2	Near-Bouton-PD	169	50
3	Near-Bouton-PD	14769	50
4	Near-Bouton-PD	16801	33.3333
5	Near-Bouton-PD	16944	75
6	Near-Bouton-PD	17307	100
7	Near-Bouton-PD	17357	66.6667
8	Near-Bouton-PD	18203	100
9	Near-Bouton-PD	16558	100
10	Near-Bouton-PD	16922	100
11	Near-Bouton-PD	17167	50
12	Near-Bouton-PD	17309	50
13	Near-Bouton-PD	17470	100
14	Near-Bouton-PD	18202	100
15	Near-Spine-PD	167	0
16	Near-Spine-PD	169	0
17	Near-Spine-PD	11807	0
18	Near-Spine-PD	11810	0
19	Near-Spine-PD	14769	0
20	Near-Spine-PD	16801	0
21	Near-Spine-PD	16944	0
22	Near-Spine-PD	17307	50
23	Near-Spine-PD	17357	66.6667
24	Near-Spine-PD	18203	50
25	Near-Spine-PD	16558	33.3333
26	Near-Spine-PD	16922	0
27	Near-Spine-PD	17167	33.3333
28	Near-Spine-PD	17309	0
29	Near-Spine-PD	17470	0
30	Near-Spine-PD	18202	50
31	Spine-PD	167	0
32	Spine-PD	169	0
33	Spine-PD	11807	0
34	Spine-PD	11810	0
35	Spine-PD	14769	0
36	Spine-PD	16801	50
37	Spine-PD	16944	0
38	Spine-PD	17307	66.6667
39	Spine-PD	17357	50
40	Spine-PD	18203	0
41	Spine-PD	16558	0
42	Spine-PD	16922	0
43	Spine-PD	17167	0
44	Spine-PD	17309	25
45	Spine-PD	17470	0
46	Spine-PD	18202	0
