# Supplementary material for: Light-induced engagement of microglia to focally remodel synapses in the adult brain
Source: eLife. 2020 Aug 18;9:e58435. doi: 10.7554/eLife.58435 (PMC7470825; doi:10.7554/eLife.58435)
Supplement: Figure 3—figure supplement 1—source data 1. [file elife-58435-fig3-figsupp1-data1.xlsx]

## Sheet: Figure 3 — figure supplement 1B
ID	Mice ID	Treatment groups	Body weight evaluation
			Pre-treatment	Post-treatment
1	14769	Control	29.5	30.8
2	16801	Control	28.8	28.7
3	16944	Control	27.6	28.1
4	17307	Control	28.2	27.9
5	17357	Control	27.4	28
6	18203	Control	28.7	27.8
7	16558	PLX	28.5	28
8	16922	PLX	27.8	28.2
9	17167	PLX	28.2	28.9
10	17470	PLX	28	27.6
11	17309	PLX	27.5	27.3
12	18202	PLX	28.9	29.7

## Sheet: Figure 3—figure supplement 1C;D
ID	Mice ID	Treatment groups	Field Area (mm2)	Number of microglia in RSC (Tom+)	Number of microglia in RSC (IBA-1)	Number of microglia in RSC (Tom+) mm2	Number of microglia in RSC (IBA-1) mm2
1	14769	Control	17.424
2	16801	Control	17.424	24.2632	24.3158	422.761	423.678
4	16944	Control	17.424	24.3684	24.5263	424.595	427.347
6	17307	Control	17.424	26.7368	26.7368	465.863	465.863
8	17357	Control	17.424	26.4737	26.4737	461.277	461.277
12	18203	Control	17.424
3	16558	PLX	17.424	0.315789	0.315789	5.50232	5.50232
5	16922	PLX	17.424	0.315789	0.315789	5.50232	5.50232
7	17167	PLX	17.424	0.157895	0.157895	2.75116	2.75116
9	17470	PLX	17.424	0.210526	0.210526	3.66821	3.66821
10	17309	PLX	17.424
11	18202	PLX	17.424
13	18204	Naïve	17.424
14	16942	Naïve	17.424	24.7368	24.7895	431.015	431.932
15	17168	Naïve	17.424	23.7368	23.7895	413.591	414.508
16	17166	Naïve	17.424	22.6316	22.6842	394.333	395.25
17	17968	Naïve	17.424	24.8947	24.8947	433.766	433.766
18	17969	Naïve	17.424
	Missing Values
PLX Group	Mice treated with PLX3397+Nutella
Control	Mice fed with nutella
Naïve	Mice fed with normal chow
