# Supplementary material for: Light-induced engagement of microglia to focally remodel synapses in the adult brain
Source: eLife. 2020 Aug 18;9:e58435. doi: 10.7554/eLife.58435 (PMC7470825; doi:10.7554/eLife.58435)
Supplement: Figure 3—figure supplement 2—source data 1. [file elife-58435-fig3-figsupp2-data1.xlsx]

## Sheet: Figure 3 — figure supple 2A;E;I
ID	Type of Photodamage	Treatment Groups	Treatment_time	MiceID	Number of Replicates	Number of Spines or Boutons (µm)
1	Near-Bouton-PD	Control	Post	14769	2	0.157069
2	Near-Bouton-PD	Control	Post	16801	7	0.217369
3	Near-Bouton-PD	Control	Post	16944	4	0.154795
4	Near-Bouton-PD	Control	Post	17307	3	0.183841
5	Near-Bouton-PD	Control	Post	17357	2	0.168904
6	Near-Bouton-PD	Control	Post	18203	2	0.206964
15	Near-Bouton-PD	Control	Pre	14769	2	0.225165
16	Near-Bouton-PD	Control	Pre	16801	3	0.23531
17	Near-Bouton-PD	Control	Pre	16944	4	0.172309
18	Near-Bouton-PD	Control	Pre	17307	2	0.139633
19	Near-Bouton-PD	Control	Pre	17357	3	0.165936
20	Near-Bouton-PD	Control	Pre	18203	2	0.206437
7	Near-Bouton-PD	PLX	Post	16558	4	0.15958
8	Near-Bouton-PD	PLX	Post	16922	3	0.198132
9	Near-Bouton-PD	PLX	Post	17167	3	0.185231
10	Near-Bouton-PD	PLX	Post	17309	4	0.177804
11	Near-Bouton-PD	PLX	Post	17470	3	0.163737
12	Near-Bouton-PD	PLX	Post	18202	3	0.150388
21	Near-Bouton-PD	PLX	Pre	16558	3	0.187227
22	Near-Bouton-PD	PLX	Pre	16922	3	0.173005
23	Near-Bouton-PD	PLX	Pre	17167	2	0.134549
24	Near-Bouton-PD	PLX	Pre	17309	2	0.232032
25	Near-Bouton-PD	PLX	Pre	17470	2	0.236141
26	Near-Bouton-PD	PLX	Pre	18202	2	0.213195
27	Near-Spine-PD	Control	Post	14769	2	0.420463
28	Near-Spine-PD	Control	Post	16801	3	0.499748
29	Near-Spine-PD	Control	Post	16944	4	0.527467
30	Near-Spine-PD	Control	Post	17307	3	0.346397
31	Near-Spine-PD	Control	Post	17357	3	0.469298
32	Near-Spine-PD	Control	Post	18203	3	0.567834
43	Near-Spine-PD	Control	Pre	14769	1	0.500963
44	Near-Spine-PD	Control	Pre	16801	3	0.610891
45	Near-Spine-PD	Control	Pre	16944	2	0.35991
46	Near-Spine-PD	Control	Pre	17307	2	0.367971
47	Near-Spine-PD	Control	Pre	17357	3	0.422292
48	Near-Spine-PD	Control	Pre	18203	2	0.430755
33	Near-Spine-PD	PLX	Post	16558	5	0.543419
34	Near-Spine-PD	PLX	Post	16922	2	0.470716
35	Near-Spine-PD	PLX	Post	17167	2	0.402006
36	Near-Spine-PD	PLX	Post	17309	2	0.370974
37	Near-Spine-PD	PLX	Post	17470	2	0.42338
38	Near-Spine-PD	PLX	Post	18202	3	0.418948
49	Near-Spine-PD	PLX	Pre	16558	3	0.464571
50	Near-Spine-PD	PLX	Pre	16922	3	0.460856
51	Near-Spine-PD	PLX	Pre	17167	3	0.493903
52	Near-Spine-PD	PLX	Pre	17309	5	0.490609
53	Near-Spine-PD	PLX	Pre	17470	2	0.582418
54	Near-Spine-PD	PLX	Pre	18202	2	0.551143
55	Spine-PD	Control	Post	14769	2	0.687745
56	Spine-PD	Control	Post	16801	4	0.533249
57	Spine-PD	Control	Post	16944	2	0.576671
58	Spine-PD	Control	Post	17307	2	0.349998
59	Spine-PD	Control	Post	17357	4	0.42284
60	Spine-PD	Control	Post	18203	1	0.422914
71	Spine-PD	Control	Pre	14769	5	0.555939
72	Spine-PD	Control	Pre	16801	2	0.529707
73	Spine-PD	Control	Pre	16944	3	0.476301
74	Spine-PD	Control	Pre	17307	3	0.498582
75	Spine-PD	Control	Pre	17357	2	0.47176
76	Spine-PD	Control	Pre	18203	3	0.544049
61	Spine-PD	PLX	Post	16558	5	0.519229
62	Spine-PD	PLX	Post	16922	2	0.495758
63	Spine-PD	PLX	Post	17167	2	0.340069
64	Spine-PD	PLX	Post	17309	3	0.495253
65	Spine-PD	PLX	Post	17470	2	0.556671
66	Spine-PD	PLX	Post	18202	2	0.404762
77	Spine-PD	PLX	Pre	16558	5	0.470728
78	Spine-PD	PLX	Pre	16922	6	0.531735
79	Spine-PD	PLX	Pre	17167	3	0.564652
80	Spine-PD	PLX	Pre	17309	4	0.446896
81	Spine-PD	PLX	Pre	17470	3	0.565528
82	Spine-PD	PLX	Pre	18202	2	0.454966

## Sheet: Figure 3 — figure supple 2B;F;J
ID	Type of Photodamage	Treatment Groups	Treatment_time	MiceID	Number of Replicates	Turnover (%)
1	Near-Bouton-PD	Control	Post	14769	2	0
2	Near-Bouton-PD	Control	Post	16801	7	0
3	Near-Bouton-PD	Control	Post	16944	4	3
4	Near-Bouton-PD	Control	Post	17307	3	1
5	Near-Bouton-PD	Control	Post	17357	2	0
6	Near-Bouton-PD	Control	Post	18203	2	0
15	Near-Bouton-PD	Control	Pre	14769	2	0
16	Near-Bouton-PD	Control	Pre	16801	3	0
17	Near-Bouton-PD	Control	Pre	16944	4	3
18	Near-Bouton-PD	Control	Pre	17307	2	2
19	Near-Bouton-PD	Control	Pre	17357	3	0
20	Near-Bouton-PD	Control	Pre	18203	2	0
7	Near-Bouton-PD	PLX	Post	16558	4	1
8	Near-Bouton-PD	PLX	Post	16922	3	2
9	Near-Bouton-PD	PLX	Post	17167	3	0
10	Near-Bouton-PD	PLX	Post	17309	4	0
11	Near-Bouton-PD	PLX	Post	17470	3	0
12	Near-Bouton-PD	PLX	Post	18202	3	0
21	Near-Bouton-PD	PLX	Pre	16558	3	2
22	Near-Bouton-PD	PLX	Pre	16922	3	2
23	Near-Bouton-PD	PLX	Pre	17167	2	0
24	Near-Bouton-PD	PLX	Pre	17309	2	0
25	Near-Bouton-PD	PLX	Pre	17470	2	0
26	Near-Bouton-PD	PLX	Pre	18202	2	0
27	Near-Spine-PD	Control	Post	14769	2	0
28	Near-Spine-PD	Control	Post	16801	3	0
29	Near-Spine-PD	Control	Post	16944	4	0
30	Near-Spine-PD	Control	Post	17307	3	0.5
31	Near-Spine-PD	Control	Post	17357	3	0
32	Near-Spine-PD	Control	Post	18203	3	0
43	Near-Spine-PD	Control	Pre	14769	1	0
44	Near-Spine-PD	Control	Pre	16801	3	0
45	Near-Spine-PD	Control	Pre	16944	2	0
46	Near-Spine-PD	Control	Pre	17307	2	1
47	Near-Spine-PD	Control	Pre	17357	3	0
48	Near-Spine-PD	Control	Pre	18203	2	0
33	Near-Spine-PD	PLX	Post	16558	5	0
34	Near-Spine-PD	PLX	Post	16922	2	0
35	Near-Spine-PD	PLX	Post	17167	2	0
36	Near-Spine-PD	PLX	Post	17309	2	0
37	Near-Spine-PD	PLX	Post	17470	2	0
38	Near-Spine-PD	PLX	Post	18202	3	0
49	Near-Spine-PD	PLX	Pre	16558	3	0
50	Near-Spine-PD	PLX	Pre	16922	3	1
51	Near-Spine-PD	PLX	Pre	17167	3	0
52	Near-Spine-PD	PLX	Pre	17309	5	0
53	Near-Spine-PD	PLX	Pre	17470	2	0
54	Near-Spine-PD	PLX	Pre	18202	2	0
55	Spine-PD	Control	Post	14769	2	0
56	Spine-PD	Control	Post	16801	4	0
57	Spine-PD	Control	Post	16944	2	0
58	Spine-PD	Control	Post	17307	2	1
59	Spine-PD	Control	Post	17357	4	0
60	Spine-PD	Control	Post	18203	1	0
71	Spine-PD	Control	Pre	14769	5	0
72	Spine-PD	Control	Pre	16801	2	0
73	Spine-PD	Control	Pre	16944	3	0
74	Spine-PD	Control	Pre	17307	3	0.5
75	Spine-PD	Control	Pre	17357	2	0
76	Spine-PD	Control	Pre	18203	3	0
61	Spine-PD	PLX	Post	16558	5	0
62	Spine-PD	PLX	Post	16922	2	0
63	Spine-PD	PLX	Post	17167	2	0
64	Spine-PD	PLX	Post	17309	3	0
65	Spine-PD	PLX	Post	17470	2	0
66	Spine-PD	PLX	Post	18202	2	0
77	Spine-PD	PLX	Pre	16558	5	0
78	Spine-PD	PLX	Pre	16922	6	0.8
79	Spine-PD	PLX	Pre	17167	3	0
80	Spine-PD	PLX	Pre	17309	4	0
81	Spine-PD	PLX	Pre	17470	3	0
82	Spine-PD	PLX	Pre	18202	2	0

## Sheet: Figure 3 — figure supple 2C;G;K
ID	Type of Photodamage	Treatment Groups	Treatment_time	MiceID	Total number of Filopodia events	Number of Replicates with Filopodia	Filopodia Length (µm)
3	Near-Bouton-PD	Control	Post	14769	1	1	1.95
4	Near-Bouton-PD	Control	Post	16801	4	3	3.95941
5	Near-Bouton-PD	Control	Post	16944	4	4	2.62446
6	Near-Bouton-PD	Control	Post	17307	2	2	3.1166
7	Near-Bouton-PD	Control	Post	17357	2	2	1.20653
8	Near-Bouton-PD	Control	Post	18203	1	1	1.59988
9	Near-Bouton-PD	Control	Pre	16801	2	1	2.29164
10	Near-Bouton-PD	Control	Pre	16944	5	3	2.30076
11	Near-Bouton-PD	Control	Pre	17307	3	2	2.1864
12	Near-Bouton-PD	Control	Pre	17357	2	2	2.07528
13	Near-Bouton-PD	Control	Pre	18203	2	2	2.11907
14	Near-Bouton-PD	PLX	Post	16558	1	1	2.00022
15	Near-Bouton-PD	PLX	Post	16922	3	3	2.78127
16	Near-Bouton-PD	PLX	Post	17167	1	1	2.53008
17	Near-Bouton-PD	PLX	Post	17309	1	1	3.02314
18	Near-Bouton-PD	PLX	Post	18202	1	1	1.0818
19	Near-Bouton-PD	PLX	Pre	16558	4	3	1.69849
20	Near-Bouton-PD	PLX	Pre	16922	5	3	2.07764
21	Near-Bouton-PD	PLX	Pre	17167	1	1	1.76104
22	Near-Bouton-PD	PLX	Pre	17309	1	1	1.6352
23	Near-Bouton-PD	PLX	Pre	17470	2	2	1.47109
24	Near-Bouton-PD	PLX	Pre	18202	3	2	1.60454
25	Near-Spine-PD	Control	Post	14769	1	1	1.31876
26	Near-Spine-PD	Control	Post	17307	1	1	2.35
27	Near-Spine-PD	Control	Pre	17307	1	1	0.0544577
28	Near-Spine-PD	Control	Pre	17357	2	2	2.21547
29	Near-Spine-PD	Control	Pre	18203	1	1	1.98697
30	Near-Spine-PD	PLX	Post	17167	1	1	2.40939
31	Near-Spine-PD	PLX	Pre	16558	1	1	1.55793
32	Near-Spine-PD	PLX	Pre	17167	1	1	1.64256
33	Near-Spine-PD	PLX	Pre	18202	1	1	1.53953
34	Spine-PD	Control	Post	17307	2	1	0.913638
35	Spine-PD	Control	Pre	16801	1	1	1.80005
36	Spine-PD	Control	Pre	17307	2	2	2.64819
37	Spine-PD	Control	Pre	17357	2	1	2.56687
38	Spine-PD	PLX	Post	17309	3	3	1.98157
39	Spine-PD	PLX	Pre	17309	1	1	3.56624

## Sheet: Figure 3 — figure supple 2D;H;L
ID	Type of Photodamage	Treatment Groups	Treatment_time	MiceID	Total number of Filopodia events	Number of Replicates with Filopodia	Filopodia Stability (%)
3	Near-Bouton-PD	Control	Post	14769	1	1	66.6667
4	Near-Bouton-PD	Control	Post	16801	4	3	89.5833
5	Near-Bouton-PD	Control	Post	16944	4	4	60.4167
6	Near-Bouton-PD	Control	Post	17307	2	2	70.8333
7	Near-Bouton-PD	Control	Post	17357	2	2	50
8	Near-Bouton-PD	Control	Post	18203	1	1	50
9	Near-Bouton-PD	Control	Pre	16801	2	1	79.1667
10	Near-Bouton-PD	Control	Pre	16944	5	3	53.3333
11	Near-Bouton-PD	Control	Pre	17307	3	2	52.7778
12	Near-Bouton-PD	Control	Pre	17357	2	2	41.6667
13	Near-Bouton-PD	Control	Pre	18203	2	2	50
14	Near-Bouton-PD	PLX	Post	16558	1	1	50
15	Near-Bouton-PD	PLX	Post	16922	3	3	55.5556
16	Near-Bouton-PD	PLX	Post	17167	1	1	50
17	Near-Bouton-PD	PLX	Post	17309	1	1	83.3333
18	Near-Bouton-PD	PLX	Post	18202	1	1	25
19	Near-Bouton-PD	PLX	Pre	16558	4	3	41.6667
20	Near-Bouton-PD	PLX	Pre	16922	5	3	66.6667
21	Near-Bouton-PD	PLX	Pre	17167	1	1	50
22	Near-Bouton-PD	PLX	Pre	17309	1	1	25
23	Near-Bouton-PD	PLX	Pre	17470	2	2	29.1667
24	Near-Bouton-PD	PLX	Pre	18202	3	2	66.6667
25	Near-Spine-PD	Control	Post	14769	1	1	33.3333
26	Near-Spine-PD	Control	Post	17307	1	1	58.3333
27	Near-Spine-PD	Control	Pre	17307	1	1	8.33333
28	Near-Spine-PD	Control	Pre	17357	2	2	62.5
29	Near-Spine-PD	Control	Pre	18203	1	1	41.6667
30	Near-Spine-PD	PLX	Post	17167	1	1	91.6667
31	Near-Spine-PD	PLX	Pre	16558	1	1	25
32	Near-Spine-PD	PLX	Pre	17167	1	1	58.3333
33	Near-Spine-PD	PLX	Pre	18202	1	1	8.33333
34	Spine-PD	Control	Post	17307	2	1	50
35	Spine-PD	Control	Pre	16801	1	1	58.3333
36	Spine-PD	Control	Pre	17307	2	2	58.3333
37	Spine-PD	Control	Pre	17357	2	1	41.6667
38	Spine-PD	PLX	Post	17309	3	3	61.1111
39	Spine-PD	PLX	Pre	17309	1	1	91.6667
