# Supplementary material for: Light-induced engagement of microglia to focally remodel synapses in the adult brain
Source: eLife. 2020 Aug 18;9:e58435. doi: 10.7554/eLife.58435 (PMC7470825; doi:10.7554/eLife.58435)
Supplement: Figure 3—source data 1. — The GEE analysis was used to test whether the mean changes of each parameter (Mean Turnover %, Mean Gained %, Mean Lost %, Filopodia Occurrence %) from pre- to post-treatment measurements were different in the two treatment groups (Control and PLX). GEE models for each parameter were built as follows: time (pre- and post-treatment measurements) as repeated measures (with independent correlation structure), treatment groups (PLX and Control) as a fixed factor, time as a covariate and the interaction term between treatment and groups. For this analysis, we used the averaged values per mice. The confidence level used was 0.95. [file elife-58435-fig3-data1.xlsx]

## Sheet: Table 3
GEE analysis	Spine-PD				Near-Spine-PD				Near-Bouton-PD
	Estimate	SE	Wald	p-value	Estimate	SE	Wald	p-value	Estimate	SE	Wald	p-value
Mean Turnover(%)
Intercept	21.1097	0.98051	463.513	0	5.28364	1.08962	23.5133	1.24056e-06	9.53442	1.76606	29.1459	6.71292e-08
Treatment	-1.98391	1.58852	1.55977	0.211699	1.09142	1.40904	0.599978	0.438586	-0.754369	2.05792	0.134372	0.713941
Time	-2.96956	1.11632	7.0763	0.00781103	-0.895643	1.32611	0.45615	0.499429	1.58548	2.86036	0.307242	0.579377
Interaction Treatment*Time	-11.6424	2.2357	27.1179	1.91413e-07	-4.55138	1.64673	7.63905	0.0057118	-1.99251	3.4048	0.342468	0.558408
Mean Gained spines/boutons(%)
Intercept	10.5457	0.742293	201.836	0	2.18952	0.493637	19.6736	9.18612e-06	8.38057	1.20369	48.475	3.34532e-12
Treatment	-2.21183	0.980767	5.08595	0.0241204	2.14162	0.604211	12.5634	0.000393369	-1.73728	1.81146	0.919768	0.337536
Time	-1.53135	0.834653	3.36617	0.0665483	0.699242	0.590275	1.40329	0.236174	-0.42402	1.6716	0.0643439	0.799758
Interaction Treatment*Time	-5.08419	1.21909	17.3929	3.03958e-05	-4.23568	0.780893	29.4214	5.82308e-08	0.372436	2.55591	0.0212331	0.884146
Mean Lost spines/boutons(%)
Intercept	10.564	0.548505	370.935	0	3.09412	0.734492	17.746	2.5245e-05	1.15385	0.758472	2.31429	0.12819
Treatment	0.227918	0.941295	0.0586284	0.808677	-1.0502	0.985964	1.13455	0.286807	0.982906	1.00071	0.964742	0.325995
Time	-1.43821	0.767616	3.51039	0.0609852	-1.59489	0.897521	3.1577	0.0755698	2.0095	1.5801	1.61737	0.203459
Interaction Treatment*Time	-6.5582	1.40461	21.8002	3.02562e-06	-0.315697	1.11938	0.0795403	0.777921	-2.36495	2.12648	1.23686	0.266077
Filopodia Ocurrence (%)
Intercept	0.277778	0.115648	5.76923	0.0163092	0.277778	0.115648	5.76923	0.0163092	0.708333	0.0996715	50.5049	1.18872e-12
Treatment	-0.236111	0.121743	3.76139	0.052449	-0.0833333	0.142093	0.343949	0.557559	0.125	0.138541	0.81407	0.36692
Time	-0.194444	0.138425	1.97315	0.160113	-0.138889	0.142093	0.955414	0.328345	-0.0257937	0.138503	0.0346821	0.852263
Interaction Treatment*Time	0.319444	0.20918	2.33211	0.12673	0.0277778	0.181089	0.0235294	0.878088	-0.501984	0.186742	7.22599	0.00718556
