# Supplementary material for: Light-induced engagement of microglia to focally remodel synapses in the adult brain
Source: eLife. 2020 Aug 18;9:e58435. doi: 10.7554/eLife.58435 (PMC7470825; doi:10.7554/eLife.58435)
Supplement: Figure 3—source data 2. [file elife-58435-fig3-data2.xlsx]

## Sheet: Table 4
Pairwise-comparisons		Spine-PD				Near-Spine-PD				Near-Bouton-PD
		Estimate	SE	z-ratio	p-value	Estimate	SE	z-ratio	p-value	Estimate	SE	z-ratio	p-value
Mean Turnover (%)
Control-Before	PLX-Before	1.984	1.59	1.249	0.5956	-1.091	1.409	-0.775	0.866	0.754	2.06	0.367	0.9832
Control-Before	Control-After	2.97	1.12	2.66	0.0391	0.896	1.326	0.675	0.9065	-1.585	2.86	-0.554	0.9454
Control-Before	PLX-After	16.596	1.78	9.348	<.0001	4.356	1.159	3.759	0.001	1.161	2.33	0.499	0.9593
PLX-Before	Control-After	0.986	1.36	0.725	0.887	1.987	1.17	1.698	0.3247	-2.34	2.49	-0.941	0.7826
PLX-Before	PLX-After	14.612	1.94	7.543	<.0001	5.447	0.976	5.579	<.0001	0.407	1.85	0.22	0.9962
Control-After	PLX-After	13.626	1.57	8.661	<.0001	3.46	0.852	4.06	0.0003	2.747	2.71	1.013	0.742
Mean Gained spines/boutons (%)
Control-Before	PLX-Before	2.21	0.981	2.255	0.1087	-2.142	0.604	-3.544	0.0022	1.7373	1.81	0.959	0.7727
Control-Before	Control-After	1.53	0.835	1.835	0.257	-0.699	0.59	-1.185	0.6366	0.424	1.67	0.254	0.9943
Control-Before	PLX-After	8.83	0.964	9.155	<.0001	1.395	0.619	2.252	0.1096	1.7889	1.83	0.977	0.7628
PLX-Before	Control-After	-0.68	0.746	-0.912	0.7984	1.442	0.476	3.033	0.0129	-1.3133	1.78	-0.737	0.8823
PLX-Before	PLX-After	6.62	0.889	7.445	<.0001	3.536	0.511	6.917	<.0001	0.0516	1.93	0.027	1
Control-After	PLX-After	7.3	0.724	10.076	<.0001	2.094	0.495	4.233	0.0001	1.3648	1.8	0.757	0.8737
Mean Lost spines/boutons (%)
Control-Before	PLX-Before	-0.228	0.941	-0.242	0.995	1.05	0.986	1.065	0.7108	-0.983	1	-0.982	0.7596
Control-Before	Control-After	1.438	0.768	1.874	0.2394	1.595	0.898	1.777	0.2844	-2.01	1.58	-1.272	0.581
Control-Before	PLX-After	7.768	1.049	7.409	<.0001	2.961	0.745	3.977	0.0004	-0.627	1.47	-0.426	0.9741
PLX-Before	Control-After	1.666	0.935	1.783	0.2817	0.545	0.836	0.652	0.915	-1.027	1.53	-0.67	0.9084
PLX-Before	PLX-After	7.996	1.176	6.798	<.0001	1.911	0.669	2.856	0.0223	0.355	1.42	0.25	0.9945
Control-After	PLX-After	6.33	1.043	6.072	<.0001	1.366	0.53	2.577	0.0489	1.382	1.88	0.737	0.8824
Filopodia Ocurrence (%)
Control-Before	PLX-Before	0.2361	0.1217	1.939	0.2116	0.0833	0.142	0.586	0.9362	-0.125	0.139	-0.902	0.8036
Control-Before	Control-After	0.1944	0.1384	1.405	0.4963	0.1389	0.142	0.977	0.7623	0.0258	0.139	0.186	0.9977
Control-Before	PLX-After	0.1111	0.1911	0.581	0.9377	0.1944	0.138	1.405	0.4963	0.4028	0.128	3.149	0.0089
PLX-Before	Control-After	-0.0417	0.0851	-0.49	0.9614	0.0556	0.117	0.476	0.9644	0.1508	0.136	1.108	0.6843
PLX-Before	PLX-After	-0.125	0.1568	-0.797	0.8558	0.1111	0.112	0.99	0.7553	0.5278	0.125	4.214	0.0001
Control-After	PLX-After	-0.0833	0.1701	-0.49	0.9614	0.0556	0.112	0.495	0.9603	0.377	0.125	3.011	0.0139
