# Supplementary material for: Light-induced engagement of microglia to focally remodel synapses in the adult brain
Source: eLife. 2020 Aug 18;9:e58435. doi: 10.7554/eLife.58435 (PMC7470825; doi:10.7554/eLife.58435)
Supplement: Figure 3—source data 3. [file elife-58435-fig3-data3.xlsx]

## Sheet: Fig 3B
ID	Mice ID	Treatment groups	Field Area (mm2)	Number of microglia per field					Number of Tomato+ microglia per mm2		%Change of the number of microglia from 0 week
				0 week	1 week after treatment	2 weeks after treatment	3 weeks after treatment	4 weeks after treatment	Pre-treatment (0 week)	Post-treatment (4weeks)	1 week after treatment	2 weeks after treatment	3 weeks after treatment	4 weeks after treatment
1	14769	Control	17.424	28	26	24	28	26	487.872	453.024	92.86	85.71	100	92.86
2	16801	Control	17.424	26	26	26	24	25	453.024	435.6	100	100	92.3	96.2
3	16944	Control	17.424	26				27	453.024	470.448				103.8
4	17307	Control	17.424	30				27	522.72	470.448				90
5	17357	Control	17.424	21	20	20	18	19	365.904	331.056	95.2	95.2	85.7	90.5
6	18203	Control	17.424	29	33	32	27	32	505.296	557.568	113.7	110.34	93.103	110.34
7	16558	PLX	17.424	20	2	0	0	0	348.48	0	10	0	0	0
8	16922	PLX	17.424	28				1	487.872	17.424				3.6
9	17167	PLX	17.424	27				0	470.448	0				0
10	17470	PLX	17.424	20	2	2	1	0	348.48	0	10	10	5	0
11	17309	PLX	17.424	20	4	3	1	0	348.48	0	20	15	5	0
12	18202	PLX	17.424	25	4	2	1	0	435.6	0	16	8	4	0
	Missing Values
Control group	Mice fed with nutella
PLX group	Mice treated with PLX+nutella

## Sheet: Fig3 C2,D2,E2
ID	Type of Photodamage	Treatment Groups	Treatment_time	MiceID	Number of Replicates	Turnover %
3	Near-Bouton-PD	Control	Post	14769	2	20.202
4	Near-Bouton-PD	Control	Post	16801	7	9.79021
5	Near-Bouton-PD	Control	Post	16944	4	8.33333
6	Near-Bouton-PD	Control	Post	17307	3	16.7055
7	Near-Bouton-PD	Control	Post	17357	2	4.54545
8	Near-Bouton-PD	Control	Post	18203	2	7.14286
9	Near-Bouton-PD	Control	Pre	14769	2	8.39161
10	Near-Bouton-PD	Control	Pre	16801	3	6.26781
11	Near-Bouton-PD	Control	Pre	16944	4	14.8962
12	Near-Bouton-PD	Control	Pre	17307	2	15.5556
13	Near-Bouton-PD	Control	Pre	17357	3	3.7037
14	Near-Bouton-PD	Control	Pre	18203	2	8.39161
15	Near-Bouton-PD	PLX	Post	16558	4	9.12698
16	Near-Bouton-PD	PLX	Post	16922	3	10.0144
17	Near-Bouton-PD	PLX	Post	17167	3	3.0303
18	Near-Bouton-PD	PLX	Post	17309	4	12.1934
19	Near-Bouton-PD	PLX	Post	17470	3	3.7037
20	Near-Bouton-PD	PLX	Post	18202	3	12.1693
21	Near-Bouton-PD	PLX	Pre	16558	3	7.69231
22	Near-Bouton-PD	PLX	Pre	16922	3	11.8622
23	Near-Bouton-PD	PLX	Pre	17167	2	12.6984
24	Near-Bouton-PD	PLX	Pre	17309	2	5.55556
25	Near-Bouton-PD	PLX	Pre	17470	2	7.17949
26	Near-Bouton-PD	PLX	Pre	18202	2	7.69231
31	Near-Spine-PD	Control	Post	14769	2	5.88235
32	Near-Spine-PD	Control	Post	16801	3	2.08537
33	Near-Spine-PD	Control	Post	16944	4	2.6835
34	Near-Spine-PD	Control	Post	17307	3	5.67595
35	Near-Spine-PD	Control	Post	17357	3	3.03605
36	Near-Spine-PD	Control	Post	18203	3	6.96476
37	Near-Spine-PD	Control	Pre	14769	1	7.40741
38	Near-Spine-PD	Control	Pre	16801	3	4.20361
39	Near-Spine-PD	Control	Pre	16944	2	8.51393
40	Near-Spine-PD	Control	Pre	17307	2	7.49604
41	Near-Spine-PD	Control	Pre	17357	3	1.44928
42	Near-Spine-PD	Control	Pre	18203	2	2.63158
43	Near-Spine-PD	PLX	Post	16558	5	1.6
44	Near-Spine-PD	PLX	Post	16922	2	0
45	Near-Spine-PD	PLX	Post	17167	2	0
46	Near-Spine-PD	PLX	Post	17309	2	2.38095
47	Near-Spine-PD	PLX	Post	17470	2	0
48	Near-Spine-PD	PLX	Post	18202	3	1.5873
49	Near-Spine-PD	PLX	Pre	16558	3	4.35309
50	Near-Spine-PD	PLX	Pre	16922	3	8.15345
51	Near-Spine-PD	PLX	Pre	17167	3	8.91026
52	Near-Spine-PD	PLX	Pre	17309	5	4.24772
53	Near-Spine-PD	PLX	Pre	17470	2	8.58586
54	Near-Spine-PD	PLX	Pre	18202	2	4
59	Spine-PD	Control	Post	14769	2	19.1145
60	Spine-PD	Control	Post	16801	4	16.4462
61	Spine-PD	Control	Post	16944	2	16.3711
62	Spine-PD	Control	Post	17307	2	18.4069
63	Spine-PD	Control	Post	17357	4	19.8689
64	Spine-PD	Control	Post	18203	1	18.6335
65	Spine-PD	Control	Pre	14769	5	19.3539
66	Spine-PD	Control	Pre	16801	2	17.5799
67	Spine-PD	Control	Pre	16944	3	24.3675
68	Spine-PD	Control	Pre	17307	3	20.9747
69	Spine-PD	Control	Pre	17357	2	20.4451
70	Spine-PD	Control	Pre	18203	3	23.9373
71	Spine-PD	PLX	Post	16558	5	10.0353
72	Spine-PD	PLX	Post	16922	2	0
73	Spine-PD	PLX	Post	17167	2	8.20433
74	Spine-PD	PLX	Post	17309	3	0.952381
75	Spine-PD	PLX	Post	17470	2	3.22581
76	Spine-PD	PLX	Post	18202	2	4.66531
77	Spine-PD	PLX	Pre	16558	5	23.9821
78	Spine-PD	PLX	Pre	16922	6	21.5495
79	Spine-PD	PLX	Pre	17167	3	20.3311
80	Spine-PD	PLX	Pre	17309	4	15.901
81	Spine-PD	PLX	Pre	17470	3	17.2321
82	Spine-PD	PLX	Pre	18202	2	15.759

## Sheet: Fig3 C3;D3;E3
	Type of Photodamage	Treatment Groups	Treatment_time	MiceID	Number of Replicates	Gained(%)	Lost(%)
3	Near-Bouton-PD	Control	Post	14769	2	10.101	10.101
4	Near-Bouton-PD	Control	Post	16801	7	7.39261	2.3976
5	Near-Bouton-PD	Control	Post	16944	4	5.55556	2.77778
6	Near-Bouton-PD	Control	Post	17307	3	13.0018	3.7037
7	Near-Bouton-PD	Control	Post	17357	2	4.54545	0
8	Near-Bouton-PD	Control	Post	18203	2	7.14286	0
9	Near-Bouton-PD	Control	Pre	14769	2	8.39161	0
10	Near-Bouton-PD	Control	Pre	16801	3	6.26781	0
11	Near-Bouton-PD	Control	Pre	16944	4	12.9731	1.92308
12	Near-Bouton-PD	Control	Pre	17307	2	10.5556	5
13	Near-Bouton-PD	Control	Pre	17357	3	3.7037	0
14	Near-Bouton-PD	Control	Pre	18203	2	8.39161	0
15	Near-Bouton-PD	PLX	Post	16558	4	9.12698	0
16	Near-Bouton-PD	PLX	Post	16922	3	7.79221	2.22222
17	Near-Bouton-PD	PLX	Post	17167	3	3.0303	0
18	Near-Bouton-PD	PLX	Post	17309	4	12.1934	0
19	Near-Bouton-PD	PLX	Post	17470	3	3.7037	0
20	Near-Bouton-PD	PLX	Post	18202	3	3.7037	8.46561
21	Near-Bouton-PD	PLX	Pre	16558	3	5.12821	2.5641
22	Near-Bouton-PD	PLX	Pre	16922	3	9.29811	2.5641
23	Near-Bouton-PD	PLX	Pre	17167	2	12.6984	0
24	Near-Bouton-PD	PLX	Pre	17309	2	5.55556	0
25	Near-Bouton-PD	PLX	Pre	17470	2	3.33333	3.84615
26	Near-Bouton-PD	PLX	Pre	18202	2	3.84615	3.84615
31	Near-Spine-PD	Control	Post	14769	2	2.94118	2.94118
32	Near-Spine-PD	Control	Post	16801	3	2.08537	0
33	Near-Spine-PD	Control	Post	16944	4	1.6835	1
34	Near-Spine-PD	Control	Post	17307	3	3.71517	1.96078
35	Near-Spine-PD	Control	Post	17357	3	3.03605	0
36	Near-Spine-PD	Control	Post	18203	3	3.87132	3.09343
37	Near-Spine-PD	Control	Pre	14769	1	3.7037	3.7037
38	Near-Spine-PD	Control	Pre	16801	3	2.10181	2.10181
39	Near-Spine-PD	Control	Pre	16944	2	2.94118	5.57276
40	Near-Spine-PD	Control	Pre	17307	2	2.94118	4.55487
41	Near-Spine-PD	Control	Pre	17357	3	1.44928	0
42	Near-Spine-PD	Control	Pre	18203	2	0	2.63158
43	Near-Spine-PD	PLX	Post	16558	5	0.8	0.8
44	Near-Spine-PD	PLX	Post	16922	2	0	0
45	Near-Spine-PD	PLX	Post	17167	2	0	0
46	Near-Spine-PD	PLX	Post	17309	2	2.38095	0
47	Near-Spine-PD	PLX	Post	17470	2	0	0
48	Near-Spine-PD	PLX	Post	18202	3	1.5873	0
49	Near-Spine-PD	PLX	Pre	16558	3	4.35309	0
50	Near-Spine-PD	PLX	Pre	16922	3	4.74339	3.41006
51	Near-Spine-PD	PLX	Pre	17167	3	5.02137	3.88889
52	Near-Spine-PD	PLX	Pre	17309	5	2.65017	1.59754
53	Near-Spine-PD	PLX	Pre	17470	2	5.21886	3.367
54	Near-Spine-PD	PLX	Pre	18202	2	4	0
59	Spine-PD	Control	Post	14769	2	8.16729	10.9472
60	Spine-PD	Control	Post	16801	4	7.38668	9.0595
61	Spine-PD	Control	Post	16944	2	9.79472	6.57633
62	Spine-PD	Control	Post	17307	2	9.21569	9.19118
63	Spine-PD	Control	Post	17357	4	9.99792	9.87098
64	Spine-PD	Control	Post	18203	1	9.52381	9.10973
65	Spine-PD	Control	Pre	14769	5	7.99812	11.3558
66	Spine-PD	Control	Pre	16801	2	8.79999	8.77992
67	Spine-PD	Control	Pre	16944	3	11.3345	13.033
68	Spine-PD	Control	Pre	17307	3	11.2354	9.73936
69	Spine-PD	Control	Pre	17357	2	10.3347	10.1104
70	Spine-PD	Control	Pre	18203	3	13.5716	10.3657
71	Spine-PD	PLX	Post	16558	5	4.34134	5.694
72	Spine-PD	PLX	Post	16922	2	0	0
73	Spine-PD	PLX	Post	17167	2	2.63158	5.57276
74	Spine-PD	PLX	Post	17309	3	0	0.952381
75	Spine-PD	PLX	Post	17470	2	1.6129	1.6129
76	Spine-PD	PLX	Post	18202	2	1.72414	2.94118
77	Spine-PD	PLX	Pre	16558	5	9.89698	14.0851
78	Spine-PD	PLX	Pre	16922	6	10.3872	11.1623
79	Spine-PD	PLX	Pre	17167	3	8.82064	11.5105
80	Spine-PD	PLX	Pre	17309	4	5.79096	10.1101
81	Spine-PD	PLX	Pre	17470	3	7.22791	10.0042
82	Spine-PD	PLX	Pre	18202	2	7.87949	7.87949

## Sheet: Fig3 C4;D4;E4
ID	Type of Photodamage	Treatment Groups	Treatment_time	MiceID	Number of Replicates	Filopodia Ocurrence%
3	Near-Bouton-PD	Control	AFTER	14769	2	50
4	Near-Bouton-PD	Control	AFTER	16801	7	42.8571
5	Near-Bouton-PD	Control	AFTER	16944	4	100
6	Near-Bouton-PD	Control	AFTER	17307	3	66.6667
7	Near-Bouton-PD	Control	AFTER	17357	2	100
8	Near-Bouton-PD	Control	AFTER	18203	2	50
9	Near-Bouton-PD	Control	BEFORE	14769	2	50
10	Near-Bouton-PD	Control	BEFORE	16801	3	33.3333
11	Near-Bouton-PD	Control	BEFORE	16944	4	75
12	Near-Bouton-PD	Control	BEFORE	17307	2	100
13	Near-Bouton-PD	Control	BEFORE	17357	3	66.6667
14	Near-Bouton-PD	Control	BEFORE	18203	2	100
15	Near-Bouton-PD	PLX	AFTER	16558	4	25
16	Near-Bouton-PD	PLX	AFTER	16922	3	66.6667
17	Near-Bouton-PD	PLX	AFTER	17167	3	33.3333
18	Near-Bouton-PD	PLX	AFTER	17309	4	25
19	Near-Bouton-PD	PLX	AFTER	17470	3	0
20	Near-Bouton-PD	PLX	AFTER	18202	3	33.3333
21	Near-Bouton-PD	PLX	BEFORE	16558	3	100
22	Near-Bouton-PD	PLX	BEFORE	16922	3	100
23	Near-Bouton-PD	PLX	BEFORE	17167	2	50
24	Near-Bouton-PD	PLX	BEFORE	17309	2	50
25	Near-Bouton-PD	PLX	BEFORE	17470	2	100
26	Near-Bouton-PD	PLX	BEFORE	18202	2	100
31	Near-Spine-PD	Control	AFTER	14769	2	50
32	Near-Spine-PD	Control	AFTER	16801	3	0
33	Near-Spine-PD	Control	AFTER	16944	4	0
34	Near-Spine-PD	Control	AFTER	17307	3	33.3333
35	Near-Spine-PD	Control	AFTER	17357	3	0
36	Near-Spine-PD	Control	AFTER	18203	3	0
37	Near-Spine-PD	Control	BEFORE	14769	1	0
38	Near-Spine-PD	Control	BEFORE	16801	3	0
39	Near-Spine-PD	Control	BEFORE	16944	2	0
40	Near-Spine-PD	Control	BEFORE	17307	2	50
41	Near-Spine-PD	Control	BEFORE	17357	3	66.6667
42	Near-Spine-PD	Control	BEFORE	18203	2	50
43	Near-Spine-PD	PLX	AFTER	16558	5	0
44	Near-Spine-PD	PLX	AFTER	16922	2	0
45	Near-Spine-PD	PLX	AFTER	17167	2	50
46	Near-Spine-PD	PLX	AFTER	17309	2	0
47	Near-Spine-PD	PLX	AFTER	17470	2	0
48	Near-Spine-PD	PLX	AFTER	18202	3	0
49	Near-Spine-PD	PLX	BEFORE	16558	3	33.3333
50	Near-Spine-PD	PLX	BEFORE	16922	3	0
51	Near-Spine-PD	PLX	BEFORE	17167	3	33.3333
52	Near-Spine-PD	PLX	BEFORE	17309	5	0
53	Near-Spine-PD	PLX	BEFORE	17470	2	0
54	Near-Spine-PD	PLX	BEFORE	18202	2	50
59	Spine-PD	Control	AFTER	14769	2	0
60	Spine-PD	Control	AFTER	16801	4	0
61	Spine-PD	Control	AFTER	16944	2	0
62	Spine-PD	Control	AFTER	17307	2	50
63	Spine-PD	Control	AFTER	17357	4	0
64	Spine-PD	Control	AFTER	18203	1	0
65	Spine-PD	Control	BEFORE	14769	5	0
66	Spine-PD	Control	BEFORE	16801	2	50
67	Spine-PD	Control	BEFORE	16944	3	0
68	Spine-PD	Control	BEFORE	17307	3	66.6667
69	Spine-PD	Control	BEFORE	17357	2	50
70	Spine-PD	Control	BEFORE	18203	3	0
71	Spine-PD	PLX	AFTER	16558	5	0
72	Spine-PD	PLX	AFTER	16922	2	0
73	Spine-PD	PLX	AFTER	17167	2	0
74	Spine-PD	PLX	AFTER	17309	3	100
75	Spine-PD	PLX	AFTER	17470	2	0
76	Spine-PD	PLX	AFTER	18202	2	0
77	Spine-PD	PLX	BEFORE	16558	5	0
78	Spine-PD	PLX	BEFORE	16922	6	0
79	Spine-PD	PLX	BEFORE	17167	3	0
80	Spine-PD	PLX	BEFORE	17309	4	25
81	Spine-PD	PLX	BEFORE	17470	3	0
82	Spine-PD	PLX	BEFORE	18202	2	0
