# Supplementary material for: Light-induced engagement of microglia to focally remodel synapses in the adult brain
Source: eLife journal article supplement (doi:10.7554/elife.58435), 2020-08-18
Supplement: supp [file elife_poa_e58435_Figure_2_source_data_1.xlsx]

## Sheet: Fig2C;I;O
ID	Type of Photodamage	Type of Spines or Boutons	MiceID	Number of Replicates	Distance in µm
1	Near-Bouton-PD	new	167	2	3.20333
2	Near-Bouton-PD	new	169	2	5.88284
3	Near-Bouton-PD	new	14769	2	2.158
4	Near-Bouton-PD	new	16801	2	5.17535
5	Near-Bouton-PD	new	16944	4	5.06039
6	Near-Bouton-PD	new	17307	1	5.52227
7	Near-Bouton-PD	new	17357	1	4.92404
8	Near-Bouton-PD	new	18203	2	3.91781
9	Near-Bouton-PD	new	16558	1	1.92607
10	Near-Bouton-PD	new	16922	3	2.46814
11	Near-Bouton-PD	new	17167	2	2.23246
12	Near-Bouton-PD	new	17309	1	8.80949
13	Near-Bouton-PD	new	17470	1	1.55241
14	Near-Bouton-PD	new	18202	1	2.65848
15	Near-Bouton-PD	stable	167	2	8.32216
16	Near-Bouton-PD	stable	169	2	6.54989
17	Near-Bouton-PD	stable	14769	2	7.57882
18	Near-Bouton-PD	stable	16801	4	6.89241
19	Near-Bouton-PD	stable	16944	4	7.5921
20	Near-Bouton-PD	stable	17307	2	9.80299
21	Near-Bouton-PD	stable	17357	3	9.61997
22	Near-Bouton-PD	stable	18203	2	9.51653
23	Near-Bouton-PD	stable	16558	3	6.50976
24	Near-Bouton-PD	stable	16922	3	11.4201
25	Near-Bouton-PD	stable	17167	2	6.89541
26	Near-Bouton-PD	stable	17309	2	7.32795
27	Near-Bouton-PD	stable	17470	2	6.27795
28	Near-Bouton-PD	stable	18202	2	9.54343
29	Near-Bouton-PD	trasient	167	1	7.21347
30	Near-Bouton-PD	trasient	16801	1	0
31	Near-Bouton-PD	trasient	16922	1	2.10734
32	Near-Bouton-PD	trasient	17470	1	3.26799
33	Near-Bouton-PD	trasient	18202	2	0.558641
34	Near-Spine-PD	new	167	1	1.62902
35	Near-Spine-PD	new	169	1	1.38198
36	Near-Spine-PD	new	11807	1	3.85209
37	Near-Spine-PD	new	11810	1	2.33877
38	Near-Spine-PD	new	14769	1	1.71801
39	Near-Spine-PD	new	16801	2	1.32705
40	Near-Spine-PD	new	16944	1	3.75317
41	Near-Spine-PD	new	17307	1	3.09084
42	Near-Spine-PD	new	17357	1	5.60891
43	Near-Spine-PD	new	16558	3	2.70232
44	Near-Spine-PD	new	16922	1	2.63803
45	Near-Spine-PD	new	17167	1	3.3706
46	Near-Spine-PD	new	17309	1	2.01563
47	Near-Spine-PD	new	17470	2	2.71478
48	Near-Spine-PD	new	18202	2	1.53756
49	Near-Spine-PD	stable	167	1	5.87011
50	Near-Spine-PD	stable	169	1	7.1417
51	Near-Spine-PD	stable	11807	1	8.4491
52	Near-Spine-PD	stable	11810	1	8.22671
53	Near-Spine-PD	stable	14769	1	6.8935
54	Near-Spine-PD	stable	16801	3	6.91051
55	Near-Spine-PD	stable	16944	2	8.64623
56	Near-Spine-PD	stable	17307	2	8.20362
57	Near-Spine-PD	stable	17357	3	5.98786
58	Near-Spine-PD	stable	18203	2	5.90082
59	Near-Spine-PD	stable	16558	3	7.21342
60	Near-Spine-PD	stable	16922	3	7.9087
61	Near-Spine-PD	stable	17167	3	6.34971
62	Near-Spine-PD	stable	17309	5	7.09546
63	Near-Spine-PD	stable	17470	2	8.04667
64	Near-Spine-PD	stable	18202	2	4.5771
65	Near-Spine-PD	trasient	167	1	3.84441
66	Near-Spine-PD	trasient	11807	1	1.04074
67	Near-Spine-PD	trasient	11810	1	3.11291
68	Near-Spine-PD	trasient	14769	1	1.17976
69	Near-Spine-PD	trasient	16801	1	2.77021
70	Near-Spine-PD	trasient	16944	2	1.49864
71	Near-Spine-PD	trasient	17307	1	3.39163
72	Near-Spine-PD	trasient	18203	1	2.35493
73	Near-Spine-PD	trasient	16922	2	2.20727
74	Near-Spine-PD	trasient	17167	2	3.22061
75	Near-Spine-PD	trasient	17309	1	2.02075
76	Near-Spine-PD	trasient	17470	2	1.32171
77	Near-Spine-PD	trasient	18202	1	0
78	Spine-PD	new	167	1	0.938116
79	Spine-PD	new	169	1	3.62702
80	Spine-PD	new	14769	3	1.5915
81	Spine-PD	new	16801	2	3.12973
82	Spine-PD	new	16944	2	2.20198
83	Spine-PD	new	17307	3	3.06854
84	Spine-PD	new	17357	1	2.9326
85	Spine-PD	new	18203	3	2.53027
86	Spine-PD	new	16558	4	3.39081
87	Spine-PD	new	16922	6	2.09209
88	Spine-PD	new	17167	3	2.89142
89	Spine-PD	new	17309	4	3.32272
90	Spine-PD	new	17470	2	1.95257
91	Spine-PD	new	18202	2	1.86808
92	Spine-PD	stable	167	1	6.6526
93	Spine-PD	stable	169	1	9.13554
94	Spine-PD	stable	14769	4	8.01999
95	Spine-PD	stable	16801	2	8.58335
96	Spine-PD	stable	16944	3	9.2369
97	Spine-PD	stable	17307	3	10.3338
98	Spine-PD	stable	17357	2	8.56796
99	Spine-PD	stable	18203	3	8.47397
100	Spine-PD	stable	16558	5	9.18954
101	Spine-PD	stable	16922	6	7.57296
102	Spine-PD	stable	17167	3	6.25874
103	Spine-PD	stable	17309	4	7.05667
104	Spine-PD	stable	17470	3	7.46815
105	Spine-PD	stable	18202	2	7.55948
106	Spine-PD	trasient	167	1	0
107	Spine-PD	trasient	169	1	4.36754
108	Spine-PD	trasient	14769	4	2.05189
109	Spine-PD	trasient	16801	2	1.41223
110	Spine-PD	trasient	16944	3	2.27276
111	Spine-PD	trasient	17307	3	1.55403
112	Spine-PD	trasient	17357	2	1.05347
113	Spine-PD	trasient	18203	3	2.56014
114	Spine-PD	trasient	16558	5	1.929
115	Spine-PD	trasient	16922	6	1.8291
116	Spine-PD	trasient	17167	3	1.98917
117	Spine-PD	trasient	17309	4	0.742678
118	Spine-PD	trasient	17470	3	1.75106
119	Spine-PD	trasient	18202	2	1.63418

## Sheet: Fig2D;J;P
ID	Type of Photodamage	Type of Spines or Boutons	MiceID	Number of Replicates	Contacted spines or boutons %
1	Near-Bouton-PD	new	167	2	100
2	Near-Bouton-PD	new	169	2	100
3	Near-Bouton-PD	new	14769	2	100
4	Near-Bouton-PD	new	16801	2	100
5	Near-Bouton-PD	new	16944	4	100
6	Near-Bouton-PD	new	17307	1	50
7	Near-Bouton-PD	new	17357	1	100
8	Near-Bouton-PD	new	18203	2	100
9	Near-Bouton-PD	new	16558	1	100
10	Near-Bouton-PD	new	16922	3	100
11	Near-Bouton-PD	new	17167	2	100
12	Near-Bouton-PD	new	17309	1	100
13	Near-Bouton-PD	new	17470	1	100
14	Near-Bouton-PD	new	18202	1	100
15	Near-Bouton-PD	stable	167	2	70.8333
16	Near-Bouton-PD	stable	169	2	70
17	Near-Bouton-PD	stable	14769	2	73.3333
18	Near-Bouton-PD	stable	16801	4	27.7679
19	Near-Bouton-PD	stable	16944	4	33.3929
20	Near-Bouton-PD	stable	17307	2	40
21	Near-Bouton-PD	stable	17357	3	20
22	Near-Bouton-PD	stable	18203	2	15.4762
23	Near-Bouton-PD	stable	16558	3	38.4921
24	Near-Bouton-PD	stable	16922	3	23.3333
25	Near-Bouton-PD	stable	17167	2	22.5
26	Near-Bouton-PD	stable	17309	2	27.1429
27	Near-Bouton-PD	stable	17470	2	19.6429
28	Near-Bouton-PD	stable	18202	2	16.6667
29	Near-Bouton-PD	trasient	167	1	100
30	Near-Bouton-PD	trasient	16801	1	100
31	Near-Bouton-PD	trasient	16922	1	100
32	Near-Bouton-PD	trasient	17470	1	100
33	Near-Bouton-PD	trasient	18202	2	100
34	Near-Spine-PD	new	167	1	100
35	Near-Spine-PD	new	169	1	100
36	Near-Spine-PD	new	11807	1	100
37	Near-Spine-PD	new	11810	1	100
38	Near-Spine-PD	new	14769	1	100
39	Near-Spine-PD	new	16801	2	100
40	Near-Spine-PD	new	16944	1	100
41	Near-Spine-PD	new	17307	1	100
42	Near-Spine-PD	new	17357	1	100
43	Near-Spine-PD	new	16558	3	100
44	Near-Spine-PD	new	16922	1	100
45	Near-Spine-PD	new	17167	1	100
46	Near-Spine-PD	new	17309	1	100
47	Near-Spine-PD	new	17470	2	100
48	Near-Spine-PD	new	18202	2	100
49	Near-Spine-PD	stable	167	1	50
50	Near-Spine-PD	stable	169	1	60
51	Near-Spine-PD	stable	11807	1	37.5
52	Near-Spine-PD	stable	11810	1	35.7143
53	Near-Spine-PD	stable	14769	1	33.3333
54	Near-Spine-PD	stable	16801	3	28.5185
55	Near-Spine-PD	stable	16944	2	23.6111
56	Near-Spine-PD	stable	17307	2	20.202
57	Near-Spine-PD	stable	17357	3	32.2222
58	Near-Spine-PD	stable	18203	2	31.5385
59	Near-Spine-PD	stable	16558	3	26.6667
60	Near-Spine-PD	stable	16922	3	21.7949
61	Near-Spine-PD	stable	17167	3	31.3596
62	Near-Spine-PD	stable	17309	5	19.3379
63	Near-Spine-PD	stable	17470	2	26.0417
64	Near-Spine-PD	stable	18202	2	27.8846
65	Near-Spine-PD	trasient	167	1	100
66	Near-Spine-PD	trasient	11807	1	100
67	Near-Spine-PD	trasient	11810	1	100
68	Near-Spine-PD	trasient	14769	1	100
69	Near-Spine-PD	trasient	16801	1	100
70	Near-Spine-PD	trasient	16944	2	100
71	Near-Spine-PD	trasient	17307	1	100
72	Near-Spine-PD	trasient	18203	1	100
73	Near-Spine-PD	trasient	16922	2	100
74	Near-Spine-PD	trasient	17167	2	100
75	Near-Spine-PD	trasient	17309	1	100
76	Near-Spine-PD	trasient	17470	2	100
77	Near-Spine-PD	trasient	18202	1	100
78	Spine-PD	new	167	1	100
79	Spine-PD	new	169	1	100
80	Spine-PD	new	14769	3	100
81	Spine-PD	new	16801	2	100
82	Spine-PD	new	16944	2	100
83	Spine-PD	new	17307	3	100
84	Spine-PD	new	17357	1	100
85	Spine-PD	new	18203	3	100
86	Spine-PD	new	16558	4	100
87	Spine-PD	new	16922	6	100
88	Spine-PD	new	17167	3	100
89	Spine-PD	new	17309	4	100
90	Spine-PD	new	17470	2	100
91	Spine-PD	new	18202	2	100
92	Spine-PD	stable	167	1	10
93	Spine-PD	stable	169	1	12.5
94	Spine-PD	stable	14769	4	25.8333
95	Spine-PD	stable	16801	2	19.5187
96	Spine-PD	stable	16944	3	24.7222
97	Spine-PD	stable	17307	3	21.5278
98	Spine-PD	stable	17357	2	20
99	Spine-PD	stable	18203	3	20.3241
100	Spine-PD	stable	16558	5	30.0155
101	Spine-PD	stable	16922	6	17.4547
102	Spine-PD	stable	17167	3	22.6113
103	Spine-PD	stable	17309	4	22.5
104	Spine-PD	stable	17470	3	20.8497
105	Spine-PD	stable	18202	2	24.2857
106	Spine-PD	trasient	167	1	100
107	Spine-PD	trasient	169	1	100
108	Spine-PD	trasient	14769	4	100
109	Spine-PD	trasient	16801	2	100
110	Spine-PD	trasient	16944	3	100
111	Spine-PD	trasient	17307	3	100
112	Spine-PD	trasient	17357	2	100
113	Spine-PD	trasient	18203	3	100
114	Spine-PD	trasient	16558	5	95
115	Spine-PD	trasient	16922	6	100
116	Spine-PD	trasient	17167	3	91.6667
117	Spine-PD	trasient	17309	4	100
118	Spine-PD	trasient	17470	3	100
119	Spine-PD	trasient	18202	2	100

## Sheet: Fig2E;K;Q
ID	Type of Photodamage	Type of Spines or Boutons	MiceID	Number of Replicates	Contact duration (min)
1	Near-Bouton-PD	new	167	2	100
2	Near-Bouton-PD	new	169	2	65
3	Near-Bouton-PD	new	14769	2	100
4	Near-Bouton-PD	new	16801	2	25
5	Near-Bouton-PD	new	16944	4	95
6	Near-Bouton-PD	new	17307	1	40
7	Near-Bouton-PD	new	17357	1	90
8	Near-Bouton-PD	new	18203	2	120
9	Near-Bouton-PD	new	16558	1	80
10	Near-Bouton-PD	new	16922	3	90
11	Near-Bouton-PD	new	17167	2	60
12	Near-Bouton-PD	new	17309	1	110
13	Near-Bouton-PD	new	17470	1	110
14	Near-Bouton-PD	new	18202	1	120
15	Near-Bouton-PD	stable	167	2	120
16	Near-Bouton-PD	stable	169	2	120
17	Near-Bouton-PD	stable	14769	2	120
18	Near-Bouton-PD	stable	16801	4	120
19	Near-Bouton-PD	stable	16944	4	120
20	Near-Bouton-PD	stable	17307	2	120
21	Near-Bouton-PD	stable	17357	3	120
22	Near-Bouton-PD	stable	18203	2	120
23	Near-Bouton-PD	stable	16558	3	120
24	Near-Bouton-PD	stable	16922	3	120
25	Near-Bouton-PD	stable	17167	2	120
26	Near-Bouton-PD	stable	17309	2	120
27	Near-Bouton-PD	stable	17470	2	120
28	Near-Bouton-PD	stable	18202	2	120
29	Near-Bouton-PD	trasient	167	1	70
30	Near-Bouton-PD	trasient	16801	1	80
31	Near-Bouton-PD	trasient	16922	1	70
32	Near-Bouton-PD	trasient	17470	1	50
33	Near-Bouton-PD	trasient	18202	2	95
34	Near-Spine-PD	new	167	1	90
35	Near-Spine-PD	new	169	1	60
36	Near-Spine-PD	new	11807	1	95
37	Near-Spine-PD	new	11810	1	110
38	Near-Spine-PD	new	14769	1	110
39	Near-Spine-PD	new	16801	2	90
40	Near-Spine-PD	new	16944	1	100
41	Near-Spine-PD	new	17307	1	40
42	Near-Spine-PD	new	17357	1	110
43	Near-Spine-PD	new	16558	3	56.6667
44	Near-Spine-PD	new	16922	1	70
45	Near-Spine-PD	new	17167	1	90
46	Near-Spine-PD	new	17309	1	70
47	Near-Spine-PD	new	17470	2	60
48	Near-Spine-PD	new	18202	2	50
49	Near-Spine-PD	stable	167	1	120
50	Near-Spine-PD	stable	169	1	120
51	Near-Spine-PD	stable	11807	1	120
52	Near-Spine-PD	stable	11810	1	120
53	Near-Spine-PD	stable	14769	1	120
54	Near-Spine-PD	stable	16801	3	120
55	Near-Spine-PD	stable	16944	2	120
56	Near-Spine-PD	stable	17307	2	120
57	Near-Spine-PD	stable	17357	3	120
58	Near-Spine-PD	stable	18203	2	120
59	Near-Spine-PD	stable	16558	3	120
60	Near-Spine-PD	stable	16922	3	120
61	Near-Spine-PD	stable	17167	3	120
62	Near-Spine-PD	stable	17309	5	120
63	Near-Spine-PD	stable	17470	2	120
64	Near-Spine-PD	stable	18202	2	120
65	Near-Spine-PD	trasient	167	1	20
66	Near-Spine-PD	trasient	11807	1	30
67	Near-Spine-PD	trasient	11810	1	60
68	Near-Spine-PD	trasient	14769	1	15
69	Near-Spine-PD	trasient	16801	1	0
70	Near-Spine-PD	trasient	16944	2	20
71	Near-Spine-PD	trasient	17307	1	5
72	Near-Spine-PD	trasient	18203	1	20
73	Near-Spine-PD	trasient	16922	2	87.5
74	Near-Spine-PD	trasient	17167	2	11.6667
75	Near-Spine-PD	trasient	17309	1	45
76	Near-Spine-PD	trasient	17470	2	42.5
77	Near-Spine-PD	trasient	18202	1	10
78	Spine-PD	new	167	1	70
79	Spine-PD	new	169	1	95
80	Spine-PD	new	14769	3	73.3333
81	Spine-PD	new	16801	2	55
82	Spine-PD	new	16944	2	102.5
83	Spine-PD	new	17307	3	65
84	Spine-PD	new	17357	1	110
85	Spine-PD	new	18203	3	88.8889
86	Spine-PD	new	16558	4	72.9167
87	Spine-PD	new	16922	6	59.4444
88	Spine-PD	new	17167	3	78.8889
89	Spine-PD	new	17309	4	42.5
90	Spine-PD	new	17470	2	64.1667
91	Spine-PD	new	18202	2	62.5
92	Spine-PD	stable	167	1	120
93	Spine-PD	stable	169	1	120
94	Spine-PD	stable	14769	4	120
95	Spine-PD	stable	16801	2	120
96	Spine-PD	stable	16944	3	120
97	Spine-PD	stable	17307	3	120
98	Spine-PD	stable	17357	2	120
99	Spine-PD	stable	18203	3	120
100	Spine-PD	stable	16558	5	120
101	Spine-PD	stable	16922	6	120
102	Spine-PD	stable	17167	3	120
103	Spine-PD	stable	17309	4	120
104	Spine-PD	stable	17470	3	120
105	Spine-PD	stable	18202	2	120
106	Spine-PD	trasient	167	1	110
107	Spine-PD	trasient	169	1	30
108	Spine-PD	trasient	14769	4	40
109	Spine-PD	trasient	16801	2	20
110	Spine-PD	trasient	16944	3	34.8333
111	Spine-PD	trasient	17307	3	30.5556
112	Spine-PD	trasient	17357	2	46.6667
113	Spine-PD	trasient	18203	3	57.7778
114	Spine-PD	trasient	16558	5	34.6667
115	Spine-PD	trasient	16922	6	39.3056
116	Spine-PD	trasient	17167	3	20
117	Spine-PD	trasient	17309	4	57.5
118	Spine-PD	trasient	17470	3	18.3333
119	Spine-PD	trasient	18202	2	30

## Sheet: Fig2F;L;R
ID	Type of Photodamage	Type of Spines or Boutons	MiceID	Number of Replicates	Filopodia Ocurrence (%)
1	Near-Bouton-PD	new	167	2	0
2	Near-Bouton-PD	new	169	2	0
3	Near-Bouton-PD	new	14769	2	0
4	Near-Bouton-PD	new	16801	2	0
5	Near-Bouton-PD	new	16944	4	25
6	Near-Bouton-PD	new	17307	1	50
7	Near-Bouton-PD	new	17357	1	0
8	Near-Bouton-PD	new	18203	2	0
9	Near-Bouton-PD	new	16558	1	0
10	Near-Bouton-PD	new	16922	3	33.3333
11	Near-Bouton-PD	new	17167	2	0
12	Near-Bouton-PD	new	17309	1	0
13	Near-Bouton-PD	new	17470	1	0
14	Near-Bouton-PD	new	18202	1	100
15	Near-Bouton-PD	stable	167	2	12.5
16	Near-Bouton-PD	stable	169	2	10
17	Near-Bouton-PD	stable	14769	2	0
18	Near-Bouton-PD	stable	16801	4	7.14286
19	Near-Bouton-PD	stable	16944	4	18.3929
20	Near-Bouton-PD	stable	17307	2	20
21	Near-Bouton-PD	stable	17357	3	13.3333
22	Near-Bouton-PD	stable	18203	2	15.4762
23	Near-Bouton-PD	stable	16558	3	23.4127
24	Near-Bouton-PD	stable	16922	3	23.3333
25	Near-Bouton-PD	stable	17167	2	12.5
26	Near-Bouton-PD	stable	17309	2	7.14286
27	Near-Bouton-PD	stable	17470	2	13.3929
28	Near-Bouton-PD	stable	18202	2	8.33333
29	Near-Bouton-PD	trasient	167	1	0
30	Near-Bouton-PD	trasient	16801	1	0
31	Near-Bouton-PD	trasient	16922	1	0
32	Near-Bouton-PD	trasient	17470	1	0
33	Near-Bouton-PD	trasient	18202	2	25
34	Near-Spine-PD	new	167	1	0
35	Near-Spine-PD	new	169	1	0
36	Near-Spine-PD	new	11807	1	0
37	Near-Spine-PD	new	11810	1	0
38	Near-Spine-PD	new	14769	1	0
39	Near-Spine-PD	new	16801	2	0
40	Near-Spine-PD	new	16944	1	0
41	Near-Spine-PD	new	17307	1	0
42	Near-Spine-PD	new	17357	1	0
43	Near-Spine-PD	new	16558	3	0
44	Near-Spine-PD	new	16922	1	0
45	Near-Spine-PD	new	17167	1	0
46	Near-Spine-PD	new	17309	1	0
47	Near-Spine-PD	new	17470	2	0
48	Near-Spine-PD	new	18202	2	0
49	Near-Spine-PD	stable	167	1	0
50	Near-Spine-PD	stable	169	1	0
51	Near-Spine-PD	stable	11807	1	0
52	Near-Spine-PD	stable	11810	1	0
53	Near-Spine-PD	stable	14769	1	0
54	Near-Spine-PD	stable	16801	3	0
55	Near-Spine-PD	stable	16944	2	0
56	Near-Spine-PD	stable	17307	2	5.55556
57	Near-Spine-PD	stable	17357	3	5.55556
58	Near-Spine-PD	stable	18203	2	5
59	Near-Spine-PD	stable	16558	3	2.77778
60	Near-Spine-PD	stable	16922	3	0
61	Near-Spine-PD	stable	17167	3	4.16667
62	Near-Spine-PD	stable	17309	5	0
63	Near-Spine-PD	stable	17470	2	0
64	Near-Spine-PD	stable	18202	2	3.84615
65	Near-Spine-PD	trasient	167	1	0
66	Near-Spine-PD	trasient	11807	1	0
67	Near-Spine-PD	trasient	11810	1	0
68	Near-Spine-PD	trasient	14769	1	0
69	Near-Spine-PD	trasient	16801	1	0
70	Near-Spine-PD	trasient	16944	2	0
71	Near-Spine-PD	trasient	17307	1	0
72	Near-Spine-PD	trasient	18203	1	0
73	Near-Spine-PD	trasient	16922	2	0
74	Near-Spine-PD	trasient	17167	2	0
75	Near-Spine-PD	trasient	17309	1	0
76	Near-Spine-PD	trasient	17470	2	0
77	Near-Spine-PD	trasient	18202	1	0
78	Spine-PD	new	167	1	0
79	Spine-PD	new	169	1	0
80	Spine-PD	new	14769	3	0
81	Spine-PD	new	16801	2	0
82	Spine-PD	new	16944	2	0
83	Spine-PD	new	17307	3	0
84	Spine-PD	new	17357	1	0
85	Spine-PD	new	18203	3	0
86	Spine-PD	new	16558	4	0
87	Spine-PD	new	16922	6	0
88	Spine-PD	new	17167	3	0
89	Spine-PD	new	17309	4	0
90	Spine-PD	new	17470	2	0
91	Spine-PD	new	18202	2	0
92	Spine-PD	stable	167	1	0
93	Spine-PD	stable	169	1	0
94	Spine-PD	stable	14769	4	0
95	Spine-PD	stable	16801	2	0
96	Spine-PD	stable	16944	3	0
97	Spine-PD	stable	17307	3	2.77778
98	Spine-PD	stable	17357	2	0
99	Spine-PD	stable	18203	3	0
100	Spine-PD	stable	16558	5	0
101	Spine-PD	stable	16922	6	0
102	Spine-PD	stable	17167	3	0
103	Spine-PD	stable	17309	4	0
104	Spine-PD	stable	17470	3	0
105	Spine-PD	stable	18202	2	0
106	Spine-PD	trasient	167	1	0
107	Spine-PD	trasient	169	1	0
108	Spine-PD	trasient	14769	4	0
109	Spine-PD	trasient	16801	2	12.5
110	Spine-PD	trasient	16944	3	0
111	Spine-PD	trasient	17307	3	11.1111
112	Spine-PD	trasient	17357	2	33.3333
113	Spine-PD	trasient	18203	3	0
114	Spine-PD	trasient	16558	5	0
115	Spine-PD	trasient	16922	6	0
116	Spine-PD	trasient	17167	3	0
117	Spine-PD	trasient	17309	4	6.25
118	Spine-PD	trasient	17470	3	0
119	Spine-PD	trasient	18202	2	0
