# Supplementary figures and images for: Light-induced engagement of microglia to focally remodel synapses in the adult brain
Source: eLife journal article supplement (doi:10.7554/elife.58435), 2020-08-18

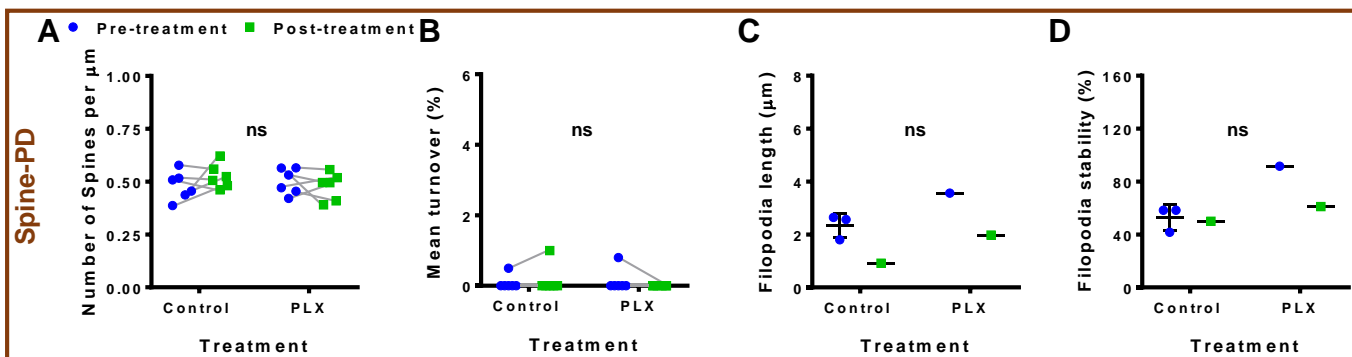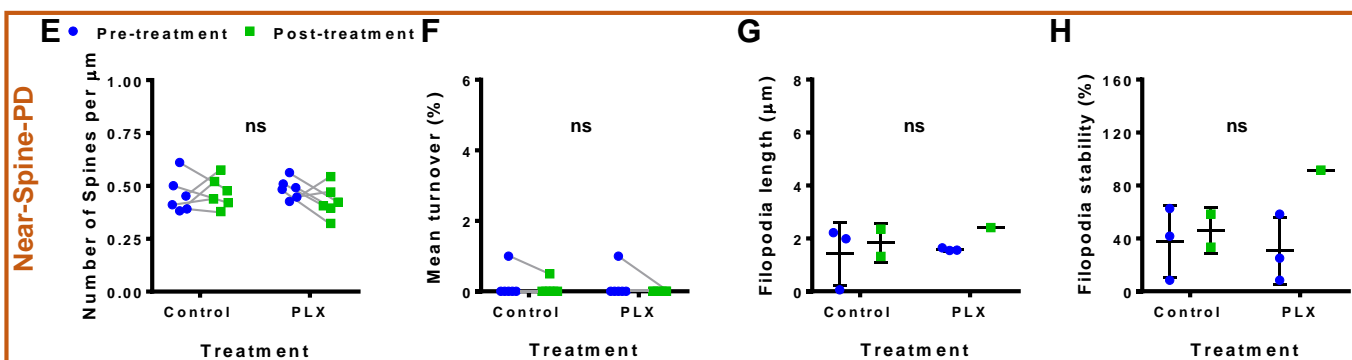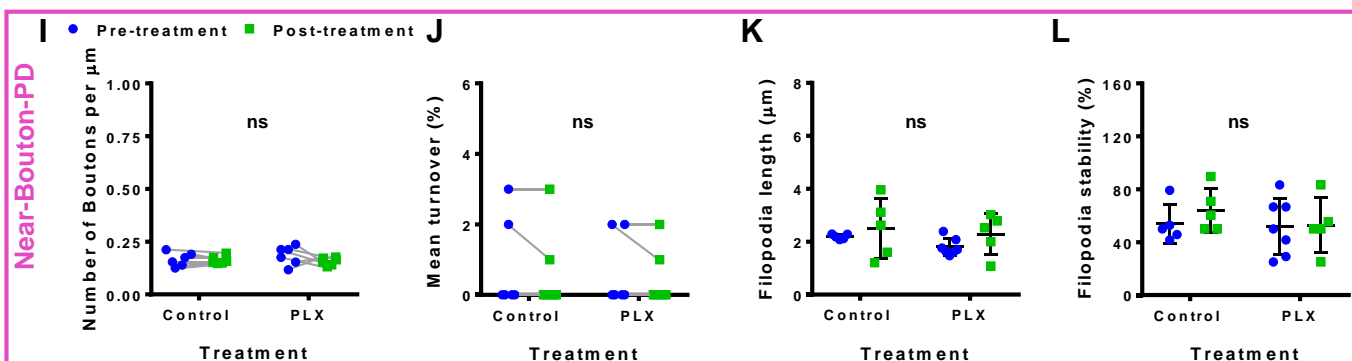

Supplement: supp [file elife-58435-supp-v1.zip]

**A**

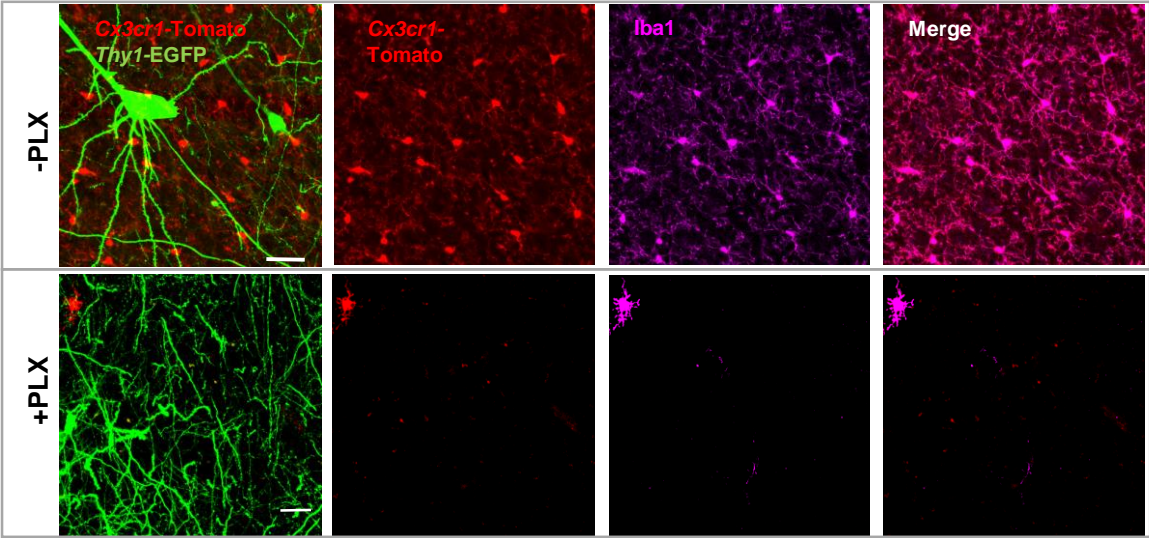

**B**

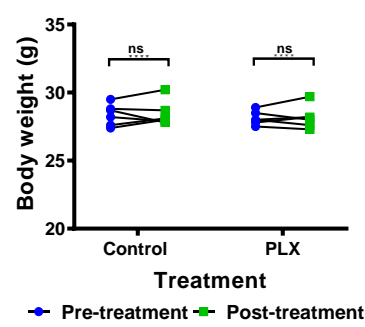

**C**

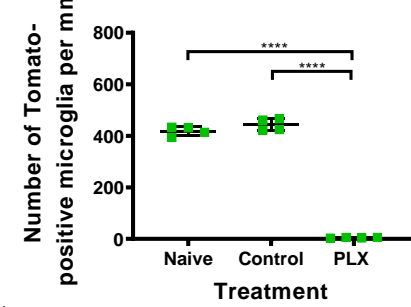

**D**

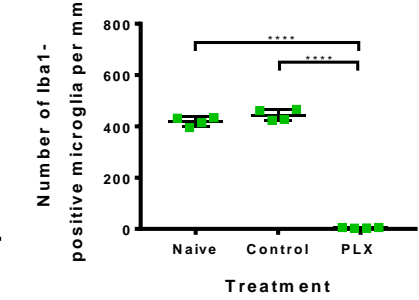

Supplement: supp [file elife-58435-supp-v1.zip]

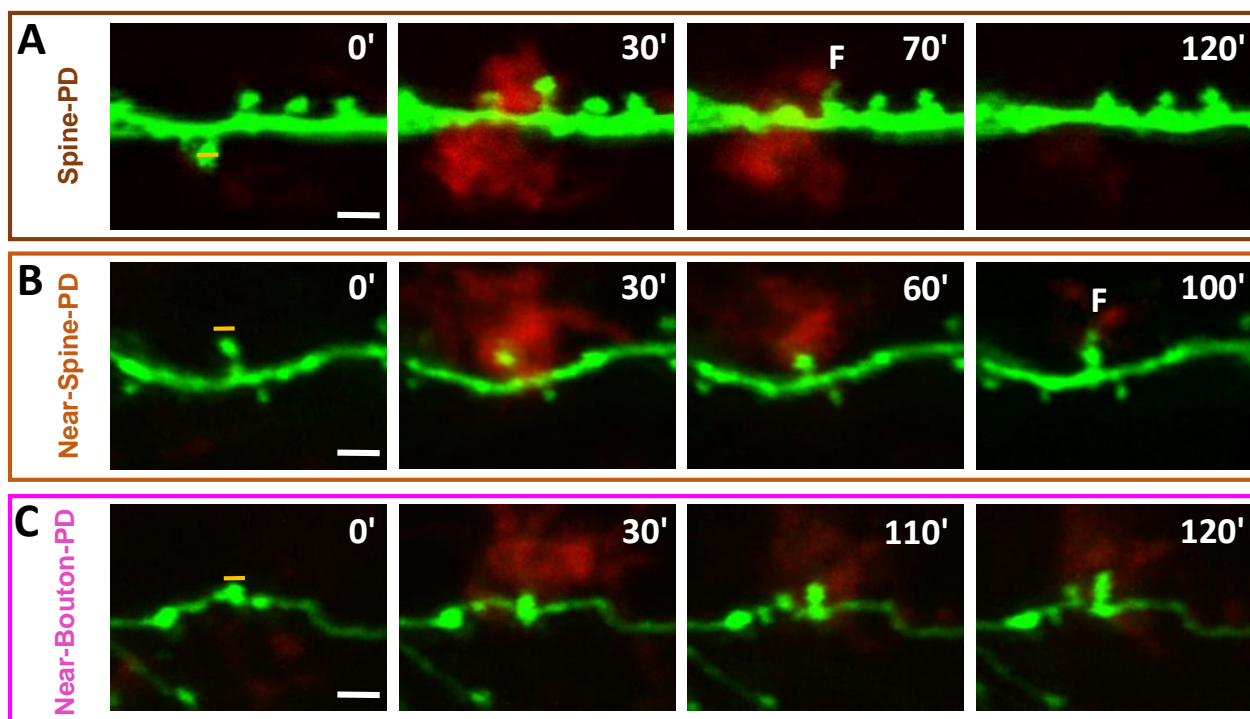

Supplement: supp [file elife-58435-supp-v1.zip]

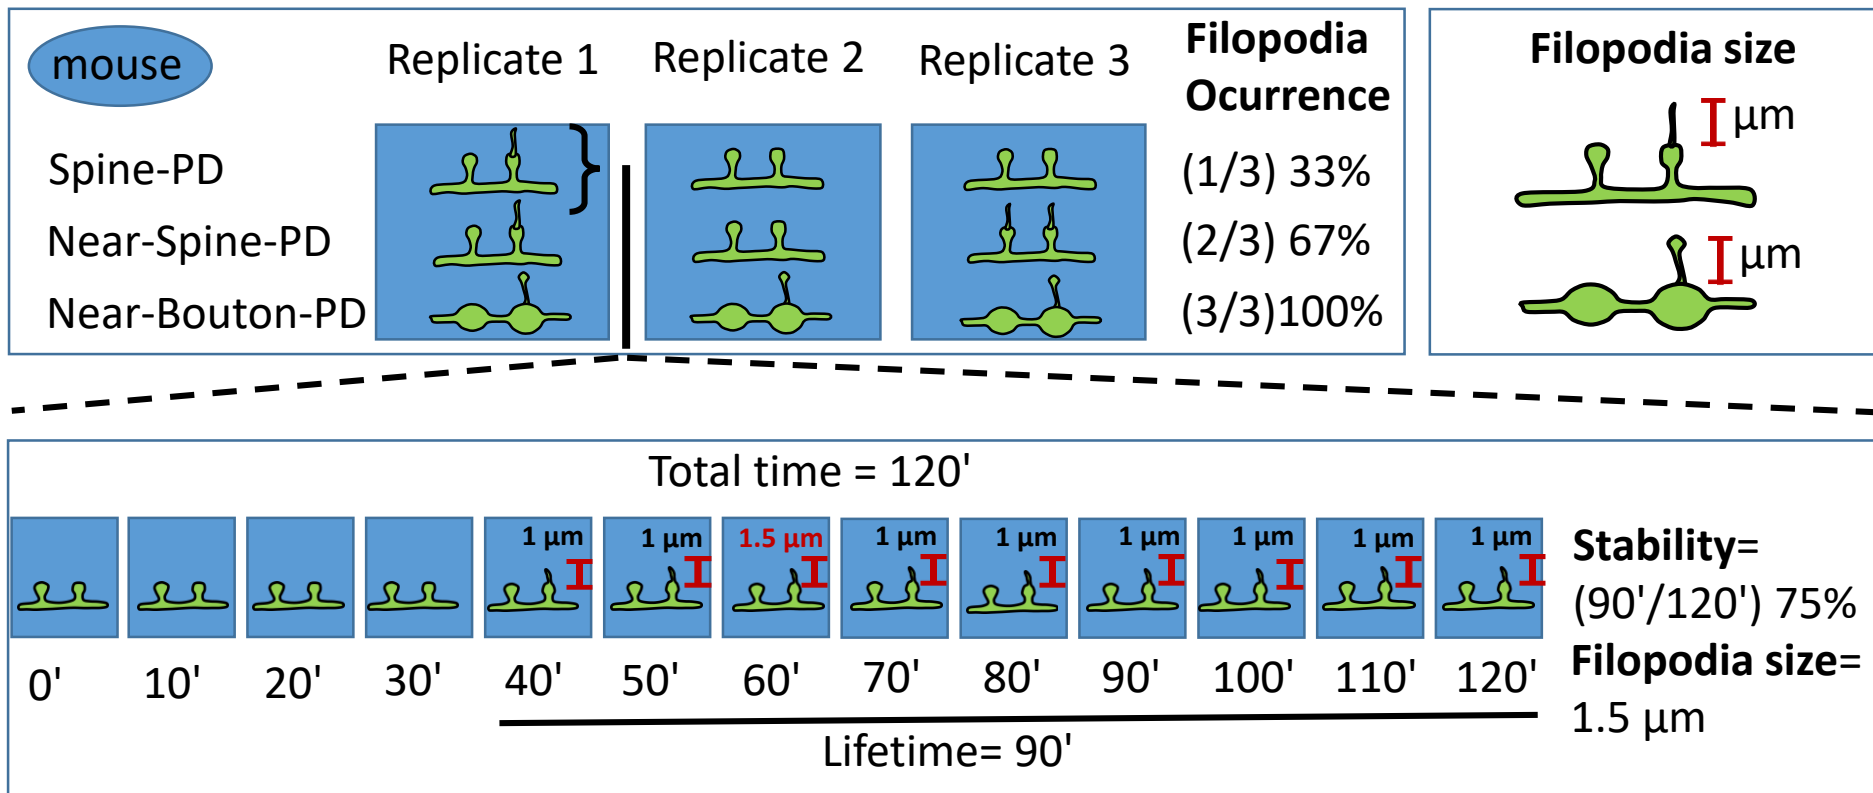

Supplement: supp [file elife-58435-supp-v1.zip]
